# Supplementary material
Source: publisher figshare collection journal article supplement (https://acs.figshare.com/ndownloader/files/13039613)
Supplement: Supplementary file 1 [file 13039613]

Compound_ID	SMILES	Efficacy TRPV1 (%ionomycin 4µM)	EC50 TRPV1 nM	IC50 TRPV1 nM	IC50 TRPV2 µM (LPC 3µM)	IC50 TRPV2 µM (CBD 2µM)
9	CCCCCCC(CC(O)CCCCCCCCC(NCC1=CC=C(O)C(OC)=C1)=O)=O	63.5 ± 0.7	78.3 ± 3.2	57.7± 2.7	>10	>10
12	CCCCCC[C@@H](O)C/C=C/CCCCCCCC(NCC1=CC=C(O)C(OC)=C1)=O	77.7 ± 0.9	3.87 ± 0.17	3.93 ± 0.03	>10	7.5 ± 1.3
15	CCCCCCC(C/C=C/CCCCCCCC(NCC1=CC=C(O)C(OC)=C1)=O)=O	73.7 ± 0.6	1.71 ± 0.06	1.84 ± 0.08	>10	4.4 ± 0.3
39	O=C(NCC1=CC=C(O)C(OC)=C1)CCSCCCCCCCCCCCCCCCC	74.2 ± 0.7	0.81 ± 0.04	0.81 ± 0.06	3.8 ± 0.8	ND
40	O=C(NCC1=CC=C(O)C(OC)=C1)CCSCCCCCCCC/C=C\CCCCCCCC	69.0 ± 0.6	0.56 ± 0.03	0.67 ± 0.03	2.5 ± 0.1	ND
41	O=C(NCC1=CC=C(O)C(OC)=C1)CCSCCCCCCCC/C=C\C/C=C\CCCCC	74.8 ± 0.4	0.36 ± 0.01	0.36 ± 0.01	1.4 ± 0.07	2.8 ± 0.4
42	O=C(OCCCCCCCCCCCCCCCC)CSCCC(NCC1=CC=C(O)C(OC)=C1)=O	68.5 ± 1.0	1.77 ± 0.18	2.81 ± 0.16	>10	ND
44	O=C(NCC1=CC=C(O)C(OC)=C1)CCSCCCCCCCC/C=C\C[C@H](O)CCCCCC	80.4 ± 1.3	0.35 ± 0.03	0.37 ± 0.02	>10	ND
45	CCCCCC[C@@H](OC(CC1=CC=CC=C1)=O)C/C=C\CCCCCCCCSCCC(NCC2=CC=C(O)C(OC)=C2)=O	70.4 ± 0.7	0.66 ± 0.03	0.73 ± 0.03	>10	ND
46	O=C(NCC1=CC=C(O)C(OC)=C1)CC[Se]CCCCCCCCCCCCCCCC	66.4 ± 0.7	1.57 ± 0.15	0.86 ± 0.08	4.3 ± 0.9	ND
47	O=C(NCC1=CC=C(O)C(OC)=C1)CC[Se]CCCCCCCC/C=C\CCCCCCCC	72.0 ± 0.7	0.63 ± 0.04	0.76 ± 0.07	1.8 ± 0.01	3.2 ± 0.2
48	O=C(NCC1=CC=C(O)C(OC)=C1)CC[Se]CCCCCCCC/C=C\C/C=C\CCCCC	70.3 ± 0.9	0.69 ± 0.05	0.74 ± 0.06	1.4 ± 0.06	2.3 ± 0.1
50	O[C@H](CCCCCC)C/C=C\CCCCCCCC[Se]CCC(NCC1=CC=C(O)C(OC)=C1)=O	73.2 ± 1.2	0.42 ± 0.04	1.1 ± 0.06	>10	1.4 ± 0.1
51	CCCCCC[C@@H](OC(CC1=CC=CC=C1)=O)C/C=C\CCCCCCCC[Se]CCC(NCC2=CC=C(O)C(OC)=C2)=O	65.7 ± 1.6	0.29 ± 0.05	0.48 ± 0.06	>10	2.3 ± 0.3
55	[NH3+][C@H](C(NCC1=CC=C(O)C(OC)=C1)=O)CSCCCCCCCCCCCCCCCC.O=C([O-])C(F)(F)F	55.5 ± 0.2	71.18 ± 1.56	160.8 ±17.7	1.4 ± 0.2	ND
56	[NH3+][C@H](C(NCC1=CC=C(O)C(OC)=C1)=O)CSCCCCCCCC/C=C\CCCCCCCC.O=C([O-])C(F)(F)F	52.5 ± 0.1	80.8 ± 1.0	188.8 ±14.9	1.9 ± 0.1	ND
57	O=C(OCCCCCCCCCCCCCCCC)CSC[C@H]([NH3+])C(NCC1=CC=C(O)C(OC)=C1)=O.O=C([O-])C(F)(F)F	52.6 ± 0.7	60.27 ± 1.98	101.6 ±13.5	1.4 ± 0.1	ND
60	[NH3+][C@H](C(NCC1=CC=C(O)C(OC)=C1)=O)C[Se]CCCCCCCCCCCCCCCC.O=C([O-])C(F)(F)F	41.2 ± 0.3	164.8 ± 4.7	399.7 ±32.1	1.2 ± 0.03	ND
61	[NH3+][C@H](C(NCC1=CC=C(O)C(OC)=C1)=O)C[Se]CCCCCCCC/C=C\CCCCCCCC.O=C([O-])C(F)(F)F	59.8 ± 0.7	75.2 ± 4.3	136.6 ± 12.5	1.7 ± 0.01	0.98 ± 0.14
64	CCCCCCCC/C=C\CCCCCCCCCCCC(NCC1=CC=C(O)C(OC)=C1)=O	75.1 ± 0.9	3.5 ± 0.2	3.5 ± 0.3	0.49 ± 0.07	1.5 ± 0.2
65	CCCCC/C=C\C/C=C\CCCCCCCCCCCC(NCC1=CC=C(O)C(OC)=C1)=O	75.2 ± 0.9	1.1 ± 0.1	1.8 ± 0.3	0.82 ± 0.12	1.8 ± 0.3
67	CCCCCCCCCCCCCCCC(N/N=C/C1=CC=C(O)C(OC)=C1)=O	< 10	NA	> 50	0.28 ± 0.04	6.0 ± 1.0
73	CCCCCCCC/C=C\CCCCCCCC(N/N=C/C1=CC=C(O)C(OC)=C1)=O	< 10	NA	42.7 ± 1.0	0.12 ± 0.01	3.0 ± 0.4
Palvanil	CCCCCCCCCCCCCCCC(=O)NCC1=CC=C(O)C(OC)=C1				>10	>10
Stevanil	CCCCCCCCCCCCCCCCCC(=O)NCC1=CC=C(O)C(OC)=C1				>10	>10
Olvanil	CCCCCCCC\C=C/CCCCCCCC(=O)NCC1=CC=C(O)C(OC)=C1				0.16±0.02	1.7±0.1
Livanil	CCCCC\C=C/C\C=C/CCCCCCCC(=O)NCC1=CC=C(O)C(OC)=C1				2.6±0.2	2.1±0.1
Eicosavanillamide	CCCCCCCCCCCCCCCCCCCC(=O)NCC1=CC=C(O)C(OC)=C1				3.1 ± 0.2	>10
PEA	CCCCCCCCCCCCCCCC(=O)NCCO				>10	>10
POEA	CCCCCC\C=C/CCCCCCCC(=O)NCCO				3.5 ± 0.01	1.7 ± 0.1
SEA	CCCCCCCCCCCCCCCCCC(=O)NCCO				>10	>10
OEA	CCCCCCCC\C=C/CCCCCCCC(=O)NCCO				1.8 ± 0.1	5.4 ± 0.2
LEA	CCCCC\C=C/C\C=C/CCCCCCCC(=O)NCCO				1.4 ± 0.1	0.65 ± 0.07
Arachidoyl-EA	CCCCCCCCCCCCCCCCCCCC(=O)NCCO				>10	>10
AEA	CCCCC\C=C/C\C=C/C\C=C/C\C=C/CCCC(=O)NCCO				8.6 ± 0.1	0.96 ± 0.09
EPEA	CC\C=C/C\C=C/C\C=C/C\C=C/C\C=C/CCCC(=O)NCCO				>10	2.3 ± 0.2
Docosaenoyl-EA	CCCCCCCC\C=C/CCCCCCCCCCCC(=O)NCCO				0.74 ± 0.02	>10
DHEA	CC\C=C/C\C=C/C\C=C/C\C=C/C\C=C/C\C=C/CCC(=O)NCCO				>10	1.6±0.1
PA	CCCCCCCCCCCCCCCC(N)=O				>10	>10
SA	CCCCCCCCCCCCCCCCCC(N)=O				>10	>10
OA	CCCCCCCC\C=C/CCCCCCCC(N)=O				2.1 ± 0.1	2.1 ± 0.2
LA	CCCCC\C=C/C\C=C/CCCCCCCC(N)=O				2.2 ± 0.1	1.2 ± 0.1
EA	CCCCCCCC\C=C/CCCCCCCCCCCC(N)=O				0.67 ± 0.13	7.1 ± 0.7
Eicosanamide	CCCCCCCCCCCCCCCCCCCC(N)=O				>10	>10
Palmitic acid	CCCCCCCCCCCCCCCC(O)=O				>10	>10
Oleic acid	CCCCCCCC\C=C/CCCCCCCC(O)=O				>10	>10
Arachidic acid	CCCCCCCCCCCCCCCCCCCC(O)=O				>10	>10
Arachidonic acid	CCCCC\C=C/C\C=C/C\C=C/C\C=C/CCCC(O)=O				>10	>10
Erucic acid	CCCCCCCC\C=C/CCCCCCCCCCCC(O)=O				>10	>10
Docosadienoic acid	CCCCC\C=C/C\C=C/CCCCCCCCCCCC(O)=O				>10	>10
